# Supplementary material
Source: PubMed Central journal article supplement (PMC4078698)
Supplement: tobaccocontrol-2012-050815-s1.pdf [file tobaccocontrol-2012-050815-s1.pdf]

**“TO QUARTERBACK BEHIND THE SCENES, THIRD PARTY EFFORTS”  
THE TOBACCO INDUSTRY’S ROLE IN SHAPING THE TEA PARTY  
Supplemental File**

Amanda Fallin, PhD, RN  
Rachel Grana, PhD, MPH  
Stanton Glantz, PhD

| <b>Table S1. Key Organizations Involved with the Tobacco Industry and the Tea Party</b> |                                                                                                                                                                                                                                                                                                                                                  |
|-----------------------------------------------------------------------------------------|--------------------------------------------------------------------------------------------------------------------------------------------------------------------------------------------------------------------------------------------------------------------------------------------------------------------------------------------------|
| <b>Name</b>                                                                             | <b>Notes</b>                                                                                                                                                                                                                                                                                                                                     |
| Americans for Prosperity                                                                | National Tea Party organizing group, created from Citizens for a Sound Economy.                                                                                                                                                                                                                                                                  |
| Burson-Marstellar                                                                       | A communication and public relations firm <sup>1</sup> that worked with Philip Morris to implement the National Smokers’ Alliance <sup>2,3</sup> to oppose the Environmental Protection Agency’s designation of secondhand smoke as a carcinogen <sup>4,5</sup> and FDA regulation of tobacco <sup>6,7</sup> .                                   |
| Center for Consumer Freedom                                                             | An organization that originated from the Guest Choice Network. <sup>8</sup> The Guest Choice Network was created with start-up funds from Philip Morris to oppose smokefree hospitality policies. <sup>9</sup>                                                                                                                                   |
| Center for Individual Freedom                                                           | An organization whose mission is: to “protect and defend individual freedoms and individual rights guaranteed by the U.S. Constitution.” Tom Humber, past president of the National Smokers' Alliance, founded the organization. Other NSA employees have leadership positions at CFIF. <sup>10-12</sup>                                         |
| Citizens for a Sound Economy                                                            | CSE was a think tank founded by David Koch and Richard Fink which received funding from corporations including tobacco, oil, and pharmaceuticals. <sup>13</sup> Between 2003 and 2004, CSE (a 501(c)4) and CSE Foundation (a 501(c)3) reorganized and became Americans for Prosperity and FreedomWorks.                                          |
| DCI Group                                                                               | A public relations firm that “helps corporations navigate their most challenging political, legislative and regulatory problems anywhere in the world” <sup>14</sup> . DCI Group consulted with AFP.                                                                                                                                             |
| FLS Connect                                                                             | A company that provides a variety services, including: “Fundraising, Voter & Constituent Contact or... Data & Communication Management” <sup>15</sup> . The predecessor organization of FLS Connect was FLS-DCI. <sup>16</sup> FLS Connect consulted with FreedomWorks.                                                                          |
| FreedomWorks                                                                            | A non-profit organization dedicated to “lower taxes, less government, more freedom” <sup>17</sup> created when Citizens for a Sound Economy merged with Empower America in 2004 <sup>18</sup> .                                                                                                                                                  |
| MediaSpeak Strategies                                                                   | A public relations firm that offers communication strategy (“We’re typically brought in to resolve a crisis in a short period of time”) and media/spokesperson appearances <sup>19</sup> that contracted with AFP in 2009 <sup>20</sup> .                                                                                                        |
| National Smokers’ Alliance                                                              | An organization Burson-Marsteller created for Philip Morris designed to appear as a grassroots movement of smokers that would advocate for the industry’s policy agenda. <sup>21, 22</sup>                                                                                                                                                       |
| National Center for Public Policy Research                                              | A Tea Party related communication and research foundation, advocating for “a strong national defense and dedicated to providing free market solutions to today's public policy problems” <sup>23</sup> .                                                                                                                                         |
| Ramhurst                                                                                | A public relations firm hired by RJR to coordinate their smokers’ rights groups. Two former RJR smokers’ rights group coordinators contributed to the creation of Ramhurst, which was established with the support of RJR <sup>24, 25</sup> . Ramhurst also assisted opposing FDA regulation <sup>25</sup> and healthcare reform <sup>26</sup> . |
| RJR Smokers' Rights Groups                                                              | Groups created by and coordinated by RJR and associated PR firms designed to appear as a grassroots movement of smokers that would advocate for the industry’s policy agenda. <sup>27</sup>                                                                                                                                                      |
| The Advancement of Sound                                                                | A group created for Philip Morris in 1993 by the public relations firm APCO                                                                                                                                                                                                                                                                      |

|                           |                                                                                                                                                                                                                                        |
|---------------------------|----------------------------------------------------------------------------------------------------------------------------------------------------------------------------------------------------------------------------------------|
| Science Coalition (TASSC) | Associates, as part of the continuing effort to undermine the EPA's secondhand smoke risk assessment. This group was disbanded, but its director, Steve Milloy, maintained its website (junkscience.com) as of 2012. <sup>28, 29</sup> |
| Walt Klein & Associates   | Advertising and public relations firm that worked with RJR and their smokers' rights groups <sup>24, 30</sup> .                                                                                                                        |

| Table S2. Key Individuals and Affiliations |                                                                                                                                                                                                                                                                                                                                                                                                                                                                                                              |     |     |              |                 |                 |                                    |                |
|--------------------------------------------|--------------------------------------------------------------------------------------------------------------------------------------------------------------------------------------------------------------------------------------------------------------------------------------------------------------------------------------------------------------------------------------------------------------------------------------------------------------------------------------------------------------|-----|-----|--------------|-----------------|-----------------|------------------------------------|----------------|
| Name                                       | Positions                                                                                                                                                                                                                                                                                                                                                                                                                                                                                                    | CSE | AFP | FreedomWorks | Other Tea Party | Tobacco Company | PR. Lobbying or political Campaign | Govn't Service |
| Dick Armye                                 | <b>FreedomWorks</b> Chairman (2003-current as of 2012) <sup>31</sup> ; lobbyist for DLA Piper (2003-2009) <sup>32</sup> ; <b>AFP</b> consultant (2003) <sup>33</sup> ; <b>CSE</b> Co-Chairman/Chairman (2003-2004) <sup>34,35</sup> ; House Majority Leader (1995-2002); major contributor to Contract for America (1994) <sup>31</sup> ; U.S House of Representatives (1985-2002) <sup>32</sup>                                                                                                             | X   | X   | X            |                 |                 | X                                  | X              |
| Deneen Moore Borelli                       | FreedomWorks fellow (current as of 2012) <sup>36</sup> ; National Center for Public Policy Research (approximately 2006-current as of 2012) <sup>37</sup> ; 20 years employment at <b>Philip Morris USA</b> <sup>36</sup>                                                                                                                                                                                                                                                                                    |     |     | X            | X               | X               |                                    |                |
| Thomas Borelli                             | National Center for Public Policy Research (approximately 2006-current as of 2012) <sup>23</sup> ; 25 years at Philip Morris/Altria, <sup>38</sup> last position: Director, Legislative Policy & Issues, <b>Philip Morris Management Corp</b> (2001-approximately 2003) <sup>39</sup>                                                                                                                                                                                                                        |     |     |              | X               | X               |                                    |                |
| Dana Joel Gattuso                          | National Center for Public Policy Research, Senior Fellow (current as of 2012); adjunct scholar, Competitive Enterprise Institute; Washington liaison, Property and Environment Research Center, Center for Free Market Environmentalism; director of projects and issue management for environmental and regulatory affairs, U.S Chamber of Commerce; director of research, Pacific Research Institute; deputy director of regulatory affairs, <b>CSE</b> <sup>40</sup>                                     | X   |     |              | X               |                 |                                    |                |
| Doug Goodyear                              | CEO and Founding Partner, DCI Group (1996-current as of 2012) <sup>41</sup> ; Ramhurst Vice President and Treasurer (approximately mid-1990's) <sup>24</sup> ; <b>RJR</b> Smokers Rights group (approximately early 1990's) <sup>24</sup> ; Vice President of Walt Klein & Associates, North Carolina; manager of Pete Dawkins' Senate campaign (1987-1988); Colorado Republican Party political Director (1985-1987) <sup>42</sup>                                                                          |     |     |              |                 | X               | X                                  |                |
| Tim Hyde                                   | Founding Partner of DCI Group (current as of 2012); <b>RJR</b> Senior Director of Public Issues (1988-1997) <sup>43</sup> National Field Director of the RJR smokers' rights groups (approximately 1989) <sup>44</sup> ; Coalitions Director, Dole/Kemp presidential campaign (1996); National Political Director, Pete DuPont presidential campaign (1987-1988); Deputy Director, National Republican Senatorial Committee (1983-1987); Executive Director, Iowa Republican Party (1979-1983) <sup>43</sup> |     |     |              |                 | X               | X                                  |                |
| W. Thomas Humber                           | Founder, Center for Individual Freedom (1998) <sup>12</sup> ; President and CEO National Smokers Alliance (1993-1997) Senior Vice President of Burson-Marsteller (1991-1993); <b>Philip Morris</b> (1990); <sup>45</sup> Director, Government Affairs, <b>Brown &amp; Williamson</b> , (1980-1988) <sup>46</sup>                                                                                                                                                                                             |     |     |              | X               | X               | X                                  |                |

| Table S2. Key Individuals and Affiliations |                                                                                                                                                                                                                                                                                                                                                                                                                                                                                                                                                                                                                                                                                                                                                                                                                                                                                             |     |     |              |                 |                 |                                    |                 |
|--------------------------------------------|---------------------------------------------------------------------------------------------------------------------------------------------------------------------------------------------------------------------------------------------------------------------------------------------------------------------------------------------------------------------------------------------------------------------------------------------------------------------------------------------------------------------------------------------------------------------------------------------------------------------------------------------------------------------------------------------------------------------------------------------------------------------------------------------------------------------------------------------------------------------------------------------|-----|-----|--------------|-----------------|-----------------|------------------------------------|-----------------|
| Name                                       | Positions                                                                                                                                                                                                                                                                                                                                                                                                                                                                                                                                                                                                                                                                                                                                                                                                                                                                                   | CSE | AFP | FreedomWorks | Other Tea Party | Tobacco Company | PR, Lobbying or political Campaign | Gov'n't Service |
| Matt Kibbe                                 | President and CEO of <b>FreedomWorks</b> (2004-current as of 2012) <sup>47</sup> ; Austrian Economic Center, Vienna, Austria-Distinguished Senior Fellow (current as of 2012) <sup>47</sup> ; Executive Vice President, CSE (1996-2004) <sup>48</sup> ; Policy Analyst, CSE (1986-1988) <sup>49</sup> Chief of Staff and House Budget Committee Associate, Representative Dan Miller (R-FL); Director of Federal Budget Policy, U.S Chamber of Commerce; Senior Economist, Republican National Committee (Chairman Lee Atwater); <i>Market Process</i> Managing Editor <sup>47</sup>                                                                                                                                                                                                                                                                                                        | X   |     | X            |                 |                 | X                                  | X               |
| Beverly McKittrick                         | <b>PMI Global Services</b> (2009) <sup>50</sup> ; Director Federal Government Affairs, <b>Altria Corp Services, Inc.</b> (2003-2008); Director Federal Government Affairs - Tobacco, <b>Altria Corp Services, Inc.</b> (2003); Director Federal Government Affairs - Tobacco, <b>Philip Morris Management Corp</b> (2001-2003); Director, Federal Policy, Tobacco, <b>Philip Morris Management Corp</b> (1999-2001); Legislative Counsel, Washington Relations, <b>Philip Morris Management Corp</b> (1995-1999) <sup>51</sup> ; specialized in legal reform and telecommunications for <b>CSE</b> <sup>52</sup> Federal Communications Commission for three years; seven years with Senator Paul Laxalt (R-NV) (four years as Senate Judiciary Committee Counsel and three years in private practice); Haley Barbour's (R-MS) Senate campaign; intern, Rep Trent Lott (R-MS) <sup>52</sup> | X   |     |              |                 | X               | X                                  | X               |
| Steve Milloy                               | Maintains junkscience.com (current as of 2012) <sup>29</sup> ; Co-director of NCPPR's Free Enterprise Project (2008); <sup>53</sup> Director of The Advancement of Sound Science Coalition (note: funded by <b>Philip Morris</b> ) <sup>54</sup>                                                                                                                                                                                                                                                                                                                                                                                                                                                                                                                                                                                                                                            |     |     |              | X               |                 |                                    |                 |
| Michele Isele Mitola                       | Vice President, Public Affairs, Forum Strategies and Communications (current as 2012) <sup>55</sup> ; Senior Manager Public Affairs, Philip Morris USA Inc. (2002-2003); Manager, Corporate Affairs Issues Management, Philip Morris USA Inc. (2001-2002); <sup>56</sup> <b>CSE</b> (1988 <sup>57</sup> -2001 <sup>58</sup> ); U.S Department of Labor and the Merit Systems Protection Board <sup>55</sup>                                                                                                                                                                                                                                                                                                                                                                                                                                                                                 | X   |     |              |                 | X               | X                                  | X               |
| Slade O'Brien                              | Florida State Director of <b>AFP</b> (2011 <sup>59</sup> -current as of 2012); <sup>60</sup> Florida Strategies Group, President <sup>60</sup> Florida Director of <b>CSE</b> (approximately 1998 <sup>60</sup> -2002); <sup>61</sup> Florida Republican Party, Special Assistant to the Chairman for Victory (1994) <sup>60</sup>                                                                                                                                                                                                                                                                                                                                                                                                                                                                                                                                                          | X   | X   |              |                 |                 |                                    | X               |
| Nancy Pfothenauer                          | MediaSpeak Strategies (current as of 2012) <sup>62</sup> ; CATO Board of Directors (2010 <sup>63</sup> -current as of 2012) <sup>62</sup> Board of Visitors at George Mason University (2010-current as 2012) <sup>62</sup> ; Economic Policy Advisor, McCain campaign (2008 campaign) <sup>64</sup> ; <b>AFP</b> President <sup>53</sup> Vice Chairman of Board of Directors and President, CEO, Independent Women's Forum (2000-2007) <sup>62</sup> ; Executive Vice President, <b>CSE</b> <sup>65</sup> ; Chief Economist for President George H. W. Bush's Council on Competitiveness (appointed 1990); Republican National Committee chief economist (1988) and senior economist (1987) <sup>65</sup>                                                                                                                                                                                  | X   | X   |              |                 |                 | X                                  | X               |
| Tom Synhorst                               | Chairman and founding partner, DCI Group (1996-current as of 2012) <sup>66</sup> ; Elizabeth Dole's senate campaign (R, NC) (2002); Advisor to Bush/Cheney (2000); political floor operations at Republican conventions (1996 & 2000);                                                                                                                                                                                                                                                                                                                                                                                                                                                                                                                                                                                                                                                      |     |     |              |                 | X               | X                                  |                 |

| Table S2. Key Individuals and Affiliations |                                                                                                                                                                                                                                                                                                                                                                                                         |     |     |              |                 |                 |                                    |                |
|--------------------------------------------|---------------------------------------------------------------------------------------------------------------------------------------------------------------------------------------------------------------------------------------------------------------------------------------------------------------------------------------------------------------------------------------------------------|-----|-----|--------------|-----------------|-----------------|------------------------------------|----------------|
| Name                                       | Positions                                                                                                                                                                                                                                                                                                                                                                                               | CSE | AFP | FreedomWorks | Other Tea Party | Tobacco Company | PR, Lobbying or political Campaign | Govn't Service |
|                                            | Ramhurst (approximately mid-1990's) <sup>24</sup> ; <b>RJR</b> field coordinator (approximately early 1990's) <sup>67</sup> ; Bob Dole's presidential campaign (1988); senior advisor for Senator Bob Dole (R-KS) (1986-1996); Charles Grassley's (R-IA) senate campaign (1980-1986) <sup>42</sup> . Note: Tom Synhorst co-founded FLS-DCI <sup>68</sup> , the predecessor to FLS-Connect <sup>16</sup> |     |     |              |                 |                 |                                    |                |
| Peggy Venable                              | State Director, <b>AFP</b> -Texas (current as of 2012) <sup>69</sup> ; Director, <b>CSE</b> -Texas <sup>70</sup> ; White House Liaison for Cabinet Secretaries, including Department of Education and Department of the Interior; Director of the Republican National Convention (1984) <sup>69</sup>                                                                                                   | X   | X   |              |                 |                 |                                    | X              |

| <b>Table S3. Citizens for a Sound Economy Funding from Tobacco Companies</b> |                           |                                                                                                                                                                                                                                                                                                                                                                                                                                                                                                                                                                                                                                                                                                                                                                                                                                                                                                                                                                                                                                                                                                                                                                                                                                       |
|------------------------------------------------------------------------------|---------------------------|---------------------------------------------------------------------------------------------------------------------------------------------------------------------------------------------------------------------------------------------------------------------------------------------------------------------------------------------------------------------------------------------------------------------------------------------------------------------------------------------------------------------------------------------------------------------------------------------------------------------------------------------------------------------------------------------------------------------------------------------------------------------------------------------------------------------------------------------------------------------------------------------------------------------------------------------------------------------------------------------------------------------------------------------------------------------------------------------------------------------------------------------------------------------------------------------------------------------------------------|
| <b>Year</b>                                                                  | <b>Amount</b>             | <b>Notes</b>                                                                                                                                                                                                                                                                                                                                                                                                                                                                                                                                                                                                                                                                                                                                                                                                                                                                                                                                                                                                                                                                                                                                                                                                                          |
| 1991                                                                         | \$191,000 <sup>71</sup>   | - An Associated Press article noted that CSE received \$191,000 to oppose regulatory powers of FDA.                                                                                                                                                                                                                                                                                                                                                                                                                                                                                                                                                                                                                                                                                                                                                                                                                                                                                                                                                                                                                                                                                                                                   |
| 1992                                                                         | \$130,000 <sup>72</sup>   | A document titled, "1993 Corporate Contributions Report for PM USA/NYO" stated that CSEF received \$130,000 in 1992.                                                                                                                                                                                                                                                                                                                                                                                                                                                                                                                                                                                                                                                                                                                                                                                                                                                                                                                                                                                                                                                                                                                  |
| 1993                                                                         | \$300,000 <sup>73</sup>   | -Document notes CSE was the Civic and Community organization recipient of "the largest charitable contribution grant".<br>-The \$300,000 is listed as "renewal of general support".                                                                                                                                                                                                                                                                                                                                                                                                                                                                                                                                                                                                                                                                                                                                                                                                                                                                                                                                                                                                                                                   |
| 1994                                                                         | \$300,000 <sup>74</sup>   | -Document (dated 3/2/95) notes CSEF was one of the Civic and Community organization recipients of the "largest charitable contribution grant" to "strengthen and expand various state projects".                                                                                                                                                                                                                                                                                                                                                                                                                                                                                                                                                                                                                                                                                                                                                                                                                                                                                                                                                                                                                                      |
| 1995                                                                         | \$985,000 <sup>75</sup>   | - On January 24, 1995, Paul Beckner wrote to Steve Parrish to request \$150,000 and described CSE's plans for the year including work on reforming the FDA: "CSE believes the FDA typifies the costs and dangers of overregulation, an issue for which the nation's voters clearly have expressed their concern" <sup>76</sup> . A Philip Morris voucher for \$150,000, prepared on January 31, 1995 for CSE was found in the documents <sup>77</sup> .<br>- On May 9, 1995, correspondence between Philip Morris employees, David Nicoli, Marc Firestone and Steve Parrish stated, "CSE has completed the first phase of their FDA reform project. The attached is a proposal they are circulating to interested parties for their second phase. We should discuss this at your earliest convenience" <sup>78</sup> . The proposal was entitled: "The Food and Drug Administration: A Case Study in Excessive Regulatory Burdens" and requested \$723,000 for CSE and \$192,000 for CSEF <sup>79</sup> .<br>-1995 Public Policy Grant Spreadsheet (dated 2/8/1996) lists \$985,000 as total 1995 expenditures. Notes say: "\$135K is PM share of ind. cont pd through C&B [Covington & Burling law firm] (T.F.budg)" <sup>75</sup> . |
| 1996                                                                         | \$500,000 <sup>80</sup>   | A letter from Steve Parrish (dated 3/25/1996) referenced an enclosed check for renewed support, with \$200,000 for CSE and \$300,000 for CSEF.                                                                                                                                                                                                                                                                                                                                                                                                                                                                                                                                                                                                                                                                                                                                                                                                                                                                                                                                                                                                                                                                                        |
| 1996                                                                         | \$40,000 <sup>81</sup>    | -Grant to New Jersey CSE<br>-Appears to have been coordinated by Tobacco Institute <sup>82</sup> , including RJR <sup>83</sup> , Brown & Williamson <sup>84</sup> and Philip Morris <sup>85</sup> with each contributing \$10,000 for their "share of New Jersey Citizens for a Sound Economy."The Smokeless Tobacco Council contributed \$5000 <sup>86</sup> .                                                                                                                                                                                                                                                                                                                                                                                                                                                                                                                                                                                                                                                                                                                                                                                                                                                                       |
| 1997                                                                         | \$100,000 <sup>87</sup>   | A document titled, "Public Policy Recommendations for 1997 with Paid Status" states that CSE received \$100,000 with "payment via WRO admin budget".                                                                                                                                                                                                                                                                                                                                                                                                                                                                                                                                                                                                                                                                                                                                                                                                                                                                                                                                                                                                                                                                                  |
| 1998                                                                         | \$500 <sup>88</sup>       | -Louisiana Citizens for a Sound Economy<br>-An attached letter to Joe Murray with RJR from Louisiana CSE Director, Beverly Smiley, (dated April 8, 1998) indicates money was for CSE's "no new tax" effort.<br>-An RJR lobbying disclosure statement listed \$500 in "grassroots/lobbying expenditures" to LA Citizens for a Sound Economy, 4/29/98. Legislation was described as: "Potential smoking restriction and excise tax increases" <sup>89</sup> .                                                                                                                                                                                                                                                                                                                                                                                                                                                                                                                                                                                                                                                                                                                                                                           |
| 1998                                                                         | \$910,000 <sup>90</sup>   | A document titled, Public Policy Review Committee Meeting Monday, March 22, 1999, under the subheading: Public Policy Grants Pending March 23, 1999 Approval, stated the 1998 support for CSE was \$910,000 <sup>90</sup> .                                                                                                                                                                                                                                                                                                                                                                                                                                                                                                                                                                                                                                                                                                                                                                                                                                                                                                                                                                                                           |
| 1999                                                                         | \$1,375,000 <sup>91</sup> | A document titled "Public Policy Grants Proposed 2000 Budget" states the amount given in 1999 was: \$1,090,000 to CSE and \$285,000 to CSEF.                                                                                                                                                                                                                                                                                                                                                                                                                                                                                                                                                                                                                                                                                                                                                                                                                                                                                                                                                                                                                                                                                          |
| 2000                                                                         | \$375,000 <sup>92</sup>   | Document titled Public Policy Grants Proposed 2001 Budget lists the amount paid in 2000 to CSE as \$175,000. Two documents list that \$100,000 was pre-paid in 1999 for 2000 <sup>91,92</sup> . A letter from Ronald S. Milstein (dated 2/4/2000) to Paul Beckner describes an enclosed check for \$100,000 from Lorillard <sup>93</sup> .                                                                                                                                                                                                                                                                                                                                                                                                                                                                                                                                                                                                                                                                                                                                                                                                                                                                                            |

|                                                                                                             |                            |                                                                                                                                                                                                                                                                                                                                                                                                                                                                                                                                                                                 |
|-------------------------------------------------------------------------------------------------------------|----------------------------|---------------------------------------------------------------------------------------------------------------------------------------------------------------------------------------------------------------------------------------------------------------------------------------------------------------------------------------------------------------------------------------------------------------------------------------------------------------------------------------------------------------------------------------------------------------------------------|
| 2001                                                                                                        | \$35,000 <sup>94, 95</sup> | An email from Joshua Slavitt, Director External Affairs for PMMC, to Ellen Merlo (among others), sent November 19, 2001 at 2:02PM, with the subject: PPRC Approvals. He requested \$35,000 “for 2001 contingency requests”. He states, “with your approval of these requests, the PPAC will close out its 2001 budget. I would appreciate your email reply indicating that you agree/disagree with these requests. An email response from Merlo, November 19, 2001, 3:49PM, Re: PPRC Approvals, stated “okay” <sup>95</sup> .                                                   |
| 2002                                                                                                        | \$50,000 <sup>94, 95</sup> | An email from Joshua Slavitt, Director External Affairs for PMMC, to Ellen Merlo (among others), sent November 19, 2001 at 2:02PM, with the subject: PPRC Approvals, requests \$50,000, listed under “advancement of 2002 grants” for “general 2002 support.” He states, “with your approval of these requests, the PPAC will close out its 2001 budget. I would appreciate your email reply indicating that you agree/disagree with these requests” <sup>94</sup> . An email response from Merlo, November 19, 2001, 3:49PM, Re: PPRC Approvals, stated “okay” <sup>95</sup> . |
| *This information is based on documents identified in LTDL; it may not reflect all financial relationships. |                            |                                                                                                                                                                                                                                                                                                                                                                                                                                                                                                                                                                                 |

| <b>Table S4. Examples of Citizens for a Sound Economy, Americans for Prosperity and FreedomWorks' pro-tobacco industry policy agenda advocacy</b> |                                                                                                                                                                                                                                                                                                                                                                                                                                                                                                                                                                                                                                                                                                                                                                                                                                                                                                                                                                                                                                                                                                                                                                                                                                                                                                                                                                                                                                                                                  |
|---------------------------------------------------------------------------------------------------------------------------------------------------|----------------------------------------------------------------------------------------------------------------------------------------------------------------------------------------------------------------------------------------------------------------------------------------------------------------------------------------------------------------------------------------------------------------------------------------------------------------------------------------------------------------------------------------------------------------------------------------------------------------------------------------------------------------------------------------------------------------------------------------------------------------------------------------------------------------------------------------------------------------------------------------------------------------------------------------------------------------------------------------------------------------------------------------------------------------------------------------------------------------------------------------------------------------------------------------------------------------------------------------------------------------------------------------------------------------------------------------------------------------------------------------------------------------------------------------------------------------------------------|
| <b>Issue</b>                                                                                                                                      | <b>Examples of Advocacy Activities</b>                                                                                                                                                                                                                                                                                                                                                                                                                                                                                                                                                                                                                                                                                                                                                                                                                                                                                                                                                                                                                                                                                                                                                                                                                                                                                                                                                                                                                                           |
| Opposing the Environmental Protection Agency Report on Secondhand Smoke                                                                           | <p><u>1992</u><br/> <b>CSE</b> and other industry allies held a conference highlighting Vice President Dan Quayle<sup>4, 5</sup>. He was chair of the Competitiveness Council, which had previously expressed interest in the effort to change the risk assessment requirements<sup>96</sup>. Burson-Marsteller “was involved in both concept and execution of a strategy that made sure that media coverage of the discrete message regarding over-regulation superseded the political noise surrounding the VP’s appearance”<sup>4</sup>.</p>                                                                                                                                                                                                                                                                                                                                                                                                                                                                                                                                                                                                                                                                                                                                                                                                                                                                                                                                  |
| Opposing Healthcare Reform                                                                                                                        | <p><u>1993-1994</u><br/> <b>CSE</b> claims to have distributed 32,753 copies of Action Alert (10 issues), had 53 radio and talk show appearances, and hosted rallies and town hall meetings<sup>97</sup>.<br/> <b>CSE</b> was a member of a tobacco industry coalition opposing healthcare reform and they coordinated protests at town hall meetings<sup>26</sup>.</p>                                                                                                                                                                                                                                                                                                                                                                                                                                                                                                                                                                                                                                                                                                                                                                                                                                                                                                                                                                                                                                                                                                          |
| Opposing Smoke-free Laws                                                                                                                          | <p><u>1994-1995</u><br/> <b>CSE</b> was a member of Get Government Off Our Back (GGOOB)<sup>98</sup>, which opposed smoke-free laws (among other anti-regulation advocacy)</p> <p><u>2006</u><br/> <b>AFP</b>: Washington, D.C.<sup>99</sup></p> <p><u>2007</u><br/> <b>AFP</b>: North Carolina<sup>100, 101</sup>; Texas<sup>102</sup>; Wisconsin<sup>103</sup><br/> <b>FreedomWorks</b>: North Carolina<sup>104-107</sup><br/> A 2007 letter from Kathy Hartkopf, <b>FreedomWorks</b> North Carolina’s Legislative Liaison posted on FreedomWorks’ blog, stated that the proposed smokefree law “deeply concerned our activists who spent many hours working in opposition to the ban. From literature drops and legislative visits to telephoning and e-mailing legislators, thank you for making your voices heard!”<sup>106</sup></p> <p><u>2008</u><br/> <b>AFP</b>: Kansas<sup>108</sup>; Texas<sup>109, 110</sup><br/> <b>FreedomWorks</b>: Virginia<sup>111</sup>; North Carolina<sup>112</sup>;</p> <p><u>2009</u><br/> <b>AFP</b>: North Carolina<sup>113, 114</sup>,<br/> Ben Marchi, Virginia <b>AFP</b> Director, was quoted in the <i>Washington Times</i> opposing a smokefree Virginia law: “The issues of concern to conservatives are whether our elected officials are going to stand up to this big-government juggernaut that’s coming at our state and our country right now”<sup>115</sup>.</p> <p><u>2010</u><br/> <b>AFP</b>: Kansas<sup>116</sup></p> |
| Opposing FDA Regulation                                                                                                                           | <p><u>1992-1995</u><br/> <b>CSE</b> was one of eight conservative think tanks working for major FDA reform. (The other seven think tanks received at least \$3.5 million in industry funding, including from tobacco, medical device, pharmaceutical, and biotechnology industries. Very little funding information was available for CSE.) These groups took advantage of the opportunity provided by the 1994 midterm elections, which led to a Republican majority in Congress, to aggressively push for a broad reform to limit the FDA’s authority<sup>117</sup>.</p> <p><u>March 1995</u><br/> <b>CSE</b> ran full ads in <i>Congressional Monitor</i> and <i>Washington Times</i> criticizing the FDA<sup>118</sup>.</p> <p>Jeffrey Pierce, CSE Regulatory Analyst published commentary in a CSE publication entitled, “FDA Review Times: The Other Half of the Story”<sup>119</sup><br/> <b>CSE</b> published an Action Alert Newsletter about the FDA, entitled “More Money is Not the Answer”<sup>120</sup>.</p> <p><u>April 1995</u><br/> <b>CSE</b> reports that they “provided a rapid response to David Kessler's proposed agency reforms. The Senate Committee on Labor and Human Resources used this analysis</p>                                                                                                                                                                                                                                                |



|                        |                                                                                                                                                                                                                                                                                                                                                                                                                                                                                                                                                                                                                                                                                                                                                                                                                                                                                                                                                                                                                                                                                                                                                                                                                                                                                                                                                                                                                                                                                                                                                                                                                                                                                                                                                                                                                                                                                                                                                                                                                                                                                                                                                                                                                                                                                                                                                                                                                                                                                                                                                                                                                    |
|------------------------|--------------------------------------------------------------------------------------------------------------------------------------------------------------------------------------------------------------------------------------------------------------------------------------------------------------------------------------------------------------------------------------------------------------------------------------------------------------------------------------------------------------------------------------------------------------------------------------------------------------------------------------------------------------------------------------------------------------------------------------------------------------------------------------------------------------------------------------------------------------------------------------------------------------------------------------------------------------------------------------------------------------------------------------------------------------------------------------------------------------------------------------------------------------------------------------------------------------------------------------------------------------------------------------------------------------------------------------------------------------------------------------------------------------------------------------------------------------------------------------------------------------------------------------------------------------------------------------------------------------------------------------------------------------------------------------------------------------------------------------------------------------------------------------------------------------------------------------------------------------------------------------------------------------------------------------------------------------------------------------------------------------------------------------------------------------------------------------------------------------------------------------------------------------------------------------------------------------------------------------------------------------------------------------------------------------------------------------------------------------------------------------------------------------------------------------------------------------------------------------------------------------------------------------------------------------------------------------------------------------------|
|                        | <p>during their tough questioning of the Commissioner”<sup>121</sup>.</p> <p><u>May 1995</u><br/> <b>CSE</b> opposed funding for a modernized FDA building, a priority of Commissioner Kessler. <b>CSE</b> Chairman Gray testified against the building before House Appropriations Committee<sup>7</sup>.</p> <p><u>1995</u><br/> <b>CSE</b> attempted “to reallocate resources from other parts of the agency to the product approval process. <b>CSE</b> worked closely with [its] former distinguished fellow, Rep. David McIntosh (R-IN), on the successful passage of an amendment to the House Agriculture, Rural Development, Food and Drug Administration, and Related Agencies Appropriations Bill that froze funding for the FDA's Office of the Commissioner [Kessler] at FY 1995 levels”<sup>122</sup>.</p>                                                                                                                                                                                                                                                                                                                                                                                                                                                                                                                                                                                                                                                                                                                                                                                                                                                                                                                                                                                                                                                                                                                                                                                                                                                                                                                                                                                                                                                                                                                                                                                                                                                                                                                                                                                           |
| Opposing RICO lawsuit  | <p><u>February 1999</u><br/> <b>CSE</b> President Beckner wrote Senate Majority Leader Trent Lott (R, MS) and House Speaker Dennis Hastert (R, IL): “On behalf of our 250,000 grassroots members, I urge you to oppose the federal government’s proposed lawsuit as well as any legislation to facilitate this unprecedented action.”<sup>123</sup>.</p> <p><u>April 1999</u><br/> <b>CSE</b> radio campaign against lawsuit abuse in four markets in Texas<sup>124</sup>.</p> <p><u>May 1999</u><br/> Alabama <b>CSE</b> Director Toby Roth wrote and distributed an opinion piece, “Please Don’t Feed the Trial Lawyers, Stop the Clinton-Gore Taxation Through Litigation Scheme” to Alabama media outlets<sup>125</sup>.</p> <p><u>June 1999</u><br/> Cathy Epley, with <b>CSE</b> Portland office, distributed an action alert to <b>CSE</b> members asking them to express their opposition to the federal lawsuit to Senator Gordon Smith (R, OR)<sup>125</sup>.</p> <p>Mell Konier (Alabama <b>CSE</b>) and other <b>CSE</b> members called Senator Jeff Sessions (R, AL) to encourage him to oppose reinserting the \$20 million appropriation for the lawsuit (which had been removed by the Appropriations Committee)<sup>125</sup>.</p> <p>William Armistead published commentary in a <b>CSE</b> publication entitled, “Federal Mass Tort Litigation: An Insidious Abuse of Power”<sup>126</sup>.</p> <p><u>July 1999</u><br/> Florida <b>CSE</b> Grassroots Manager Joyce Malone wrote Senator Connie Mack (R, FL) thanking him for meeting with her and urging that he vote to “against any effort to fund or facilitate the Justice Department’s dangerous and unprecedented lawsuit”<sup>127</sup>.</p> <p><u>September 1999</u><br/> <b>CSE</b>’s Michele Isele Mitola quoted in the <i>Washington Times</i>: “We see this as a political ploy to find ways to raise more revenue to fund their [the government’s] tax-and-spend agenda.”<sup>128</sup></p> <p><u>2000</u><br/> <b>CSE</b> organized a rally against “frivolous lawsuits” at the Iowa statehouse<sup>129</sup>.<br/> The Coalition for Legal Reform (which included <b>CSE</b>) wrote Majority Leader Trent Lott opposing a \$23 million appropriation to fund the RICO lawsuit<sup>130</sup>.</p> <p><u>2002</u><br/> <b>CSE</b> Economic Policy Analyst Jason Thomas wrote a commentary entitled, “Time for a Priority Check at the Department of Justice”<sup>131</sup>.<br/> <b>CSE</b> website included a call to action encouraging members to contact President George Bush to oppose the RICO lawsuit<sup>132</sup>.</p> |
| Opposing Tobacco Taxes | <p><b>CSE</b> opposed tobacco taxes in:</p> <p><u>1995</u><br/> <b>CSE</b>: New Jersey<sup>133-135</sup></p> <p><u>1997 (est.)</u><br/> <b>CSE</b>: Louisiana<sup>136</sup></p> <p><u>1998</u><br/> <b>CSE</b>: California<sup>137, 138</sup></p>                                                                                                                                                                                                                                                                                                                                                                                                                                                                                                                                                                                                                                                                                                                                                                                                                                                                                                                                                                                                                                                                                                                                                                                                                                                                                                                                                                                                                                                                                                                                                                                                                                                                                                                                                                                                                                                                                                                                                                                                                                                                                                                                                                                                                                                                                                                                                                  |

2002

**CSE:** Maryland <sup>139</sup>

2003

**CSE:** Oregon <sup>140</sup>

2006

**AFP:** Illinois <sup>141</sup>, Missouri <sup>142</sup>, South Dakota <sup>143, 144</sup>, Texas <sup>145, 146</sup>

**FreedomWorks:** California <sup>147-149</sup>,

Hawaii <sup>150, 151</sup>

2007

**AFP:** Wisconsin <sup>103</sup>,

Illinois <sup>152, 153</sup>

Joe Calomino (**AFP** Illinois State Director), stated, “Over the past month and a half Americans for Prosperity-Illinois and our 4,000-plus grassroots members have been writing letters to the editor, and making phone calls to our lawmakers to stop this sneaky tobacco tax grab” <sup>153</sup>.

**FreedomWorks:** Maine <sup>154</sup>, Oregon <sup>155</sup>, South Carolina <sup>156</sup>

2008

**AFP:** Illinois <sup>157</sup>

**FreedomWorks:** Florida <sup>158</sup>,

Letter from Matt Kibbe of **FreedomWorks** to Florida members stated: “With your help, we were able to flood the state capitol with letters and phone calls in opposition to the tobacco tax being proposed to increase the government’s coffers” <sup>158</sup>.

Utah <sup>159</sup>

2009

**FreedomWorks:** Arkansas <sup>160</sup>

Dick Arme of **FreedomWorks** spoke at an Arkansas rally opposing a tobacco tax increase <sup>160</sup>.

In 2009, FreedomWorks fought a proposed tobacco tax increase in Arkansas with an "Enough is Enough!" advertisement <sup>161</sup> recalling the tobacco industry campaign from the late 1980s and 1990s.

Hawaii <sup>162</sup>

FreedomWorks Chairman Dick Arme of **FreedomWorks** wrote to Governor Lingle of Hawaii: “Raising taxes on cigarettes hurts small businesses like convenience stores who receive over 34% of their in-store sales from purchases of these products. And the expected revenue will most likely never be realized as smokers go to the black market and internet to avoid skyrocketing taxes” <sup>162</sup>.

Mississippi <sup>163</sup>

2012

**AFP:** California <sup>164, 165</sup>

In 2012, as part of the No on 29 coalition (which received funding from Philip Morris USA and RJR), **AFP** sent a mailer opposing a California tax increase with “Enough is Enough!” language <sup>166</sup>.

**FreedomWorks:** California <sup>164</sup>

## REFERENCES

1. Burson-Marsteller. About us. 2012; [http://www.burson-marsteller.com/About\\_Us/Pages/About\\_Us.aspx](http://www.burson-marsteller.com/About_Us/Pages/About_Us.aspx). Accessed April 10, 2012.
2. Mosher U, Burson-Marsteller. NSA political plan outline Research1993:2023203152-2023203158.
3. [no author]. Philip Morris and Burson-Marsteller: A partnership Philip Morris1986/E:2046875317/2046875351.
4. Humber T. ETS Philip Morris1993/E.
5. Muggli ME, Hurt RD, Repace J. The tobacco industry's political efforts to derail the EPA report on ETS. *Am J Prev Med*. 2004;26(2):167-177.
6. [no author]. Notes for Jim (Re: Steve Parrish presentation) Philip Morris1995/E:2048623050/2048623057.
7. Kessler D. *A question of intent: A great American battle with a deadly industry*. New York, NY: Public Affairs; 2001.
8. Center for Consumer Freedom. The Guest Choice Network is now the Center for Consumer Freedom--at ConsumerFreedom.com. 2002; <http://web.archive.org/web/20020124091734/http://guestchoice.com/index.html>. Accessed 24 Apr, 2012.
9. Trach B. [letter from Barbara Trach with Philip Morris to Richard Berman with The Guest Choice Network] Philip Morris1995:2072395963.
10. [no author]. Daily clip report. Tuesday, January 30, 2001 (20010130)RJ Reynolds2001:525156658/525156684.
11. Dellman F. U.S. Tobacco weekly TW01-05Lorillard2001:99248461/99248471.
12. Center for Individual Freedom. About CFIF: W. Thomas Humber. 2012; <http://cfif.org/v/index.php/about-cfif/about-cfif-staff/12-cfif-staff/8-w-thomas-humber>. Accessed April 12, 2012.
13. Stone P. Grass-Roots Goliath *National Journal*. Vol July 13, 1996:1529-1533.
14. DCI Group. What we do. 2011; <http://www.dci-group.com/what-we-do>. Accessed April 10, 2012.
15. FLS Connect. Our services. FLS Connect-what we do. nd; <http://www.flconnect.com/fls-connect-what-we-do/>. Accessed April 11, 2012.
16. Center for Public Integrity. Campaign Consultants. FLS-DCI. [no date]; <http://www.iwatchnews.org/print/6639>. Accessed 29 May, 2012.
17. FreedomWorks. FreedomWorks. 1996-2012; <http://www.freedomworks.org/>. Accessed April 11, 2012.
18. FreedomWorks. About FreedomWorks: about FreedomWorks. 1996-2012; <http://www.freedomworks.org/about/about-freedomworks>. Accessed April 11, 2012.
19. MediaSpeak Strategies. Services. 2011; <http://www.mediaspeakstrategies.com/services/>. Accessed April 11, 2012.
20. Internal Revenue Service. *Americans for Prosperity Foundation Form 9902009*.
21. Mosher U, Burson-Marsteller. NSA Political Plan Outline Research1993/E.
22. Helewicz JS. National Smokers Alliance Brown & Williamson1994.
23. National Center for Public Policy Research. About us. 2005; <http://web.archive.org/web/20060109131550/http://www.nationalcenter.org/NCPPRHist.html>. Accessed March 14, 2012.
24. Stone P. The nicotine network. *Mother Jones*. 1996;May/June:50-52.
25. Stone P. Washington Update. Policy and Politics in Brief. Blowing Smoke at its Critics. *National Journal*. 1996;20 Apr.
26. Tesler LE, Malone RE. "Our Reach Is Wide by Any Corporate Standard": How the Tobacco Industry Helped Defeat the Clinton Health Plan and Why It Matters Now. *American Journal of Public Health*. 2011/12/05 2010;100(7):1174-1188.
27. Gup T. Fakin' It. *Mother Jones*. Vol May/June. 1996:53-54.
28. Ong EK, Glantz SA. Constructing "sound science" and "good epidemiology": Tobacco, lawyers and public relations firms. *American Journal of Public Health*. 2001;91(11):1749-1757.
29. Milloy S. About Steve Milloy. n.d; <http://junkscience.com/about-steve-milloy/>. Accessed 24 Apr, 2012.
30. [no author]. Public Issues 1994 plans RJ Reynolds1994:512531446/512531488.
31. Freedomworks. About Freedomworks: Chairman Dick Arme. 2006-2011; <http://www.freedomworks.org/about/chairman-dick-arme>. Accessed November 9, 2011.
32. Center for Responsive Politics. Arme, Dick. nd; [http://www.opensecrets.org/revolving/rev\\_summary.php?id=25664](http://www.opensecrets.org/revolving/rev_summary.php?id=25664). Accessed November 9, 2011.
33. Internal Revenue Service. *Americans for Prosperity Foundation Form 9902003*.

34. Citizens for a Sound Economy. CSE Co-Chairman and former House Majority Leader Dick Arney. 2003; <http://web.archive.org/web/20031124065401/http://www.cse.org/armey/index.php>. Accessed March 15 2012.
35. Citizens for a Sound Economy. CSE Chairman and former House Majority Leader Dick Arney. 2004; <http://web.archive.org/web/20040402121024/http://www.cse.org/armey/index.php>. Accessed March 16, 2012.
36. FreedomWorks. Diverse Tea: Deneen Borelli. nd; <http://blogs.freedomworks.org/DiverseTea/?p=15>. Accessed February 16, 2012.
37. National Center for Public Policy Research. About Us. 2006; <http://web.archive.org/web/20060203195824/http://www.nationalcenter.org/NCPPRHist.html>. Accessed March 14, 2012.
38. National Center for Public Policy Research. Tom Borelli, Ph.D., Senior Fellow. nd; <http://www.nationalcenter.org/bios/borelli.html>. Accessed March 14, 2012.
39. Philip Morris, University of California San Francisco, Legacy Tobacco Documents Library. Philip Morris Glossary of Names: Bm-Bz. 2007; [http://legacy.library.ucsf.edu/glossaries/pm\\_gloss\\_bo.jsp](http://legacy.library.ucsf.edu/glossaries/pm_gloss_bo.jsp). Accessed March 14, 2012.
40. Center for Environmental and Regulatory Affairs, The National Center for Public Policy Research. Dana Joel Gattuso: Senior Fellow. nd; [www.nationalcenter.org/bios/gattuso.html](http://www.nationalcenter.org/bios/gattuso.html). Accessed February 16, 2012.
41. DCI Group Public Affairs Worldwide. Doug Goodyear: Managing Partner and Chief Executive Officer 2011; <http://www.dcigroup.com/who-we-are/our-people/doug-goodyear>. Accessed March 19, 2012.
42. DCI Group. Leadership. 2004; <http://web.archive.org/web/20040110103317/http://www.dcigroup.com/2021/wrapper.jsp?PID=2021-15>. Accessed March 20, 2012.
43. DCI Group. Tim Hyde: Founding Partner. 2011; <http://www.dcigroup.com/who-we-are/our-people/tim-hyde>. Accessed March 16, 2012.
44. RJ Reynolds. 1992 Operating Plan RJ Reynolds 1989:513889702/513889780.
45. Landman A, Glantz SA. Tobacco industry efforts to undermine policy-relevant research. *American Journal of Public Health*. 2009;99:45-58.
46. British American Tobacco, University of California San Francisco, Legacy Tobacco Documents Library. British American Tobacco (BAT) Glossary of Names: H. [no date]; [http://legacy.library.ucsf.edu/glossaries/bat\\_gloss\\_h.jsp](http://legacy.library.ucsf.edu/glossaries/bat_gloss_h.jsp). Accessed March 22, 2012.
47. FreedomWorks. Matt Kibbe Biography. 1996-2012; <http://www.freedomworks.org/matt-kibbe-biography>. Accessed March 20, 2012.
48. Forum Strategies & Communications. Expert Net: Academic Experts. [no date]; <http://www.forumstrategies.com/SUBPRIME/subprimenewsroom.com/expertnet.php>. Accessed May 28, 2012.
49. FreedomWorks. CSE President Paul Beckner to Join Silk Lintott Incorporated 2004; <http://www.freedomworks.org/press-releases/cse-president-paul-beckner-to-join-silk-lintott-in>. Accessed March 20, 2012.
50. Center for Responsive Politics. McKittrick, Beverly. Lobbyist profile: Summary, 2009. nd; <http://www.opensecrets.org/lobby/lobbyist.php?id=Y0000003759L&year=2009>. Accessed April 12, 2012.
51. Philip Morris, University of California San Francisco, Legacy Tobacco Documents Library. Philip Morris Glossary of Names: Ma-Md. nd; [http://legacy.library.ucsf.edu/glossaries/pm\\_gloss\\_m.jsp](http://legacy.library.ucsf.edu/glossaries/pm_gloss_m.jsp). Accessed March 14, 2012.
52. author] n. Beverly McKittrick, Director, Federal Policy-Tobacco Philip Morris Management Corp Philip Morris 1995/E:2077264739.
53. National Center for Public Policy Research. Press release: Top corporate watchdogs form new Free Enterprise Project at National Center for Public Policy Research. 2008; [http://www.nationalcenter.org/PR-Free\\_Enterprise\\_Project\\_100108.html](http://www.nationalcenter.org/PR-Free_Enterprise_Project_100108.html). Accessed April 2, 2012.
54. Milloy S. Annual Report Philip Morris 1998:2065254885/2065254890.
55. Forum Strategies & Communications. About us: Michele Mitola. 2008; [http://www.forumstrategies.com/about/michele\\_mittola.html](http://www.forumstrategies.com/about/michele_mittola.html). Accessed 30 May, 2012.
56. Philip Morris, University of California San Francisco, Legacy Tobacco Documents Library. Philip Morris Glossary of Names: Me-Mz. nd; [http://legacy.library.ucsf.edu/glossaries/pm\\_gloss\\_me.jsp](http://legacy.library.ucsf.edu/glossaries/pm_gloss_me.jsp).
57. Citizens for a Sound Economy, Citizens for a Sound Economy Foundation. Stopping new tax increases by presenting a positive alternative to the President's tobacco plan Lorillard 1999:83834597/83834617.

58. Citizens for a Sound Economy Foundation. Expanding children's education opportunities. 2001; [http://www.freedomworks.org/reports/cc298\\_Education-Ellig.pdf](http://www.freedomworks.org/reports/cc298_Education-Ellig.pdf). Accessed March 21, 2012.
59. Americans for Prosperity. Americans for Prosperity Welcomes Slade O'Brien as Florida State Director. 2011; <http://americansforprosperity.org/newsroom/062711-americans-prosperity-welcomes-slade-obrien-florida-state-director-0/>. Accessed March 20, 2012.
60. Americans for Prosperity Florida. Slade O'Brien-Florida State Director. 2011; <http://americansforprosperity.org/062711-slade-obrien-florida-state-director>. Accessed January 9 2012.
61. Citizens for a Sound Economy. Florida CSE Day at the Capitol. 2002; [http://web.archive.org/web/20020821203840/http://www.cse.org/newsroom/press\\_template.php?press\\_id=192](http://web.archive.org/web/20020821203840/http://www.cse.org/newsroom/press_template.php?press_id=192). Accessed March 14, 2012.
62. MediaSpeak Strategies. About Nancy. 2011; <http://www.mediaspeakstrategies.com/about-nancy/>. Accessed March 16 2012.
63. CATO Institute. Board of Directors. 2010; <http://web.archive.org/web/20101215192226/http://www.cato.org/people/directors.html>. Accessed March 16, 2012.
64. John McCain 2008- Press Office. Senator McCain announces economic advisors: Policy team is a collection of leading conservatives. 2007; <http://www.usatoday.com/news/pdf/mccain-economic-team-7-12-07.htm>. Accessed 13 Apr, 2012.
65. Independent Women's Forum. About IWF: Nancy Mitchell Pfothenauer. 2004; [http://web.archive.org/web/20041214151602/www.iwf.org/about\\_iwf/pfothenauer.asp](http://web.archive.org/web/20041214151602/www.iwf.org/about_iwf/pfothenauer.asp). Accessed March 16 2012.
66. DCI Group. Tom Synhorst: Managing partner and chairman. 2011; <http://www.dci-group.com/who-we-are/our-people/tom-synhorst>. Accessed 30 May, 2012.
67. Ogburn TL. Public Issues Weekly Update March 18-22, 1991RJ Reynolds1991:507655646/507655648.
68. Miller L, Center for Media and Democracy. Powers Behind the Throne. 2004; <http://www.prwatch.org/prwissues/2004Q4/powers.html>. Accessed March 9, 2012.
69. Americans for Prosperity. AFP-Texas State Director: Peggy Venable. 2008; <http://web.archive.org/web/20101119120703/http://americansforprosperity.org/012510-afp-texas-state-director-peggy-venable>. Accessed January 9 2012.
70. Beckner P, Citizens for a Sound Economy. {letter to Pat Donoho with the Tobacco Institute from Paul Beckner with CSE and Citizens for a Sound Economy 1996 Annual Report]Tobacco Institute1997:TI31020428-TI31020464.
71. Drinkard J. Think Tanks-FDA. *AP US & World*. 23 Jul, 1996.
72. [no author]. 1993 Corporate Contributions Report for PM USA/NYOPhilip Morris1993:2073010046/2073010047.
73. [no author]. Draft-1/24/94Philip Morris1994:2047320185/2047320189.
74. [no author]. Contributions-Primary questionsPhilip Morris1995:2048759103/2048759120.
75. [no author]. 1995 Public policy grantsPhilip Morris1996:2047243266-2047243269.
76. Beckner P. [letter from Paul Beckner with Citizens for a Sound Economy to Steve Parrish with Philip Morris]Philip Morris1995:2046379809/2046379810.
77. Parrish SC. Philip Morris VoucherPhilip Morris1995:2046379808.
78. Nicoli DP. [memo from David Nicoli to Marc Firestone and Steve Parrish]Philip Morris1995:2048389604.
79. Citizens for a Sound Economy, Citizens for a Sound Economy Foundation. The Food and Drug Administration: A Case Study in Excessive Regulatory BurdensPhilip Morris1995:2048389605/2048389613.
80. Parrish SC. [letter from Steven Parrish with Philip Morris to Paul Beckner with Citizens for a Sound Economy]Philip Morris1996:2073948111.
81. Tobacco Institute. New Jersey Citizens for a Sound EconomyTobacco Institute1996:TI15301093.
82. Isele M. [letter from Michele Isele with Citizens for a Sound Economy to Pat Donoho with The Tobacco Institute]Tobacco Institute1996.
83. Tobacco Institute. InvoiceTobacco Institute1996:TI15820170.
84. Tobacco Institute. [letter from Pat Donoho with the Tobacco Institute to Bob Pruett with Brown & Williamson]Tobacco Institute1996:TI15820165.
85. Tobacco Institute. InvoiceTobacco Institute1996:TI15820168.
86. Tobacco Institute. InvoiceTobacco Institute1996:TI15820172.

87. [no author]. Public Policy recommendations for 1997 with paid status Philip Morris1998:2063351196/2063351220.
88. RJ Reynolds, Smiley B. [Check, Voucher and letter from Beverly Smiley with Louisiana Citizens for a Sound Economy to Joe Murray with R.J. Reynolds]RJ Reynolds1998:518240470/518240474.
89. Miller S. Lobbying Disclosure StatementRJ Reynolds1998:518286402/518286410.
90. Carney A. Public policy review committee meetingPhilip Morris1999:2073204294/2073204297.
91. [no author]. Public policy grants proposed 2000 budgetPhilip Morris2000/E:2076395003/2076395017.
92. [no author]. Public policy grants proposed 2001 budgetPhilip Morris2000/E:2080434443/2080434449.
93. Milstein RS. [letter from Ronald Milstein with Lorillard to Paul Beckner with Citizens for a Sound Economy]Lorillard2000:86051920.
94. Slavitt J. PPRC approvalsPhilip Morris2001:2085802214A-2085802215.
95. Merlo E. Re: PPRC approvalsPhilip Morris2001:2085802214.
96. Fuller C, Linehan K. Presentation to the Board of DirectorsPhilip Morris1992.
97. Citizens for a Sound Economy. *The demise of 'Clintoncare': How Citizens for a Sound Economy fought government run healthcare*: Grassroots America; [no date].
98. Apollonio DE, Bero LA. The Creation of Industry Front Groups: The Tobacco Industry and "Get Government Off Our Back". *American Journal of Public Health*. 2011/12/05 2007;97(3):419-427.
99. Americans for Prosperity. AFP District of Columbia blog. Put that cigarette out. 2006; <http://web.archive.org/web/20110712084654/http://www.americansforprosperity.org/put-cigarette-out>. Accessed October 24, 2011.
100. Americans for Prosperity Foundation. Smoking ban defeat is victory for private property rights. 2007; <http://web.archive.org/web/20110215010801/http://www.americansforprosperity.org/smoking-ban-defeat-victory-private-property-rights>. Accessed October 24 2011.
101. Hayes C. AFP North Carolina Blog. Compromise on Smoking Ban: Look to Virginia. 2007; <http://www.americansforprosperity.org/compromise-smoking-ban-look-virginia>. Accessed October 24, 2011.
102. Americans for Prosperity Texas. Ban "smoking bans" by Jan Brauner. 2007; <http://web.archive.org/web/20110215142800/http://www.americansforprosperity.org/ban-smoking-bans-jan-brauner>. Accessed October 24, 2011.
103. Americans for Prosperity Wisconsin. Rally against tobacco tax and legislation that would hurt small business. 2007; <http://web.archive.org/web/20110215071334/http://www.americansforprosperity.org/rally-against-tobacco-tax-and-legislation-would-hurt-small-business>. Accessed October 25, 2011.
104. Lillard M. Health, property rights at issue with workplace smoking ban. 2007; <http://www.freedomworks.org/news/health-property-rights-at-issue-with-workplace-smo>. Accessed January 11, 2012.
105. Steinhauer B. Help us defeat the North Carolina smoking ban! 2007; <http://www.freedomworks.org/2007/03/29/help-us-defeat-the-smoking-ban>. Accessed January 11, 2012.
106. FreedomWorks. FreedomWorks defeats North Carolina smoking ban! <http://www.freedomworks.org/press-releases/freedomworks-defeats-north-carolina-smoking-ban>. Accessed January 11, 2012.
107. Brandon A. Act now to protect personal freedom! <http://www.freedomworks.org/press-releases/act-now-to-protect-personal-freedom>. Accessed January 11, 2012.
108. Weeks B, Americans for Prosperity Kansas. Property rights should control Kansas smoking decisions,. 2008; <http://web.archive.org/web/20110628220118/http://www.americansforprosperity.org/print/11000>. Accessed October 24,, 2011.
109. Americans for Prosperity Texas. AFP Texas Newsroom: Hearing on freedom issues. 2008; <http://web.archive.org/web/20110131191539/http://www.americansforprosperity.org/hearing-freedom-issues>. Accessed October 24, 2011.
110. Americans for Prosperity Texas. AFP Texas Blog: Tell Government to "Butt" Out. 2008; <http://web.archive.org/web/20110207212830/http://www.americansforprosperity.org/tell-government-butt-out>. Accessed October 24, 2011.
111. Brandon A. Take back the commonwealth: Virginia 2008. <http://www.freedomworks.org/press-releases/take-back-the-commonwealth-virginia-2008>. Accessed January 11, 2012.
112. Brandon A. North Carolina FreedomWorks day at the capitol. <http://www.freedomworks.org/press-releases/north-carolina-freedomworks-day-at-the-capitol>. Accessed January 11, 2012.

113. Woolverton P. "Weakened smoking ban bill clears hurdle in House". *Fayetteville Observer*. . April 2, 2009;State and Regional News.
114. Robertson GD. Senate OKs smoking ban; Bill to remove exposure in bars, restaurants moves to House. *Star-News* May 12, 2009;1B.
115. Emerling G. Smoking ban battle could flare anew; Backlash a possibility in House elections. *The Washington Times*. March 2, 2009, 2009;D.C Area: A14.
116. Hanna J. Casino exemption complicates push for smoking ban. *The Associated Press State & Local Wire*2010;State and regional.
117. Public Citizen Congress Watch. *A million for your thoughts: The industry-funded campaign against the FDA by conservative think tanks*1996.
118. Beckner P. Food and Drug Administration reform activity updatePhilip Morris1995:2046982619/2046982620.
119. Pierce JJ. Issues and Answers: FDA Review Times: The Other Half of the StoryPhilip Morris1995.
120. Citizens for a Sound Economy. Action Alert Newsletter: More money is not the answerPhilip Morris1995:2046982660.
121. Beckner P. Update on Food and Drug Administration reform activitiesPhilip Morris1995:2046982621/2046982622.
122. Citizens for a Sound Economy, Citizens for a Sound Economy Foundation. The Food and Drug Administration: A case study in excessive regulatory burdens. A proposal of Citizens for a Sound Economy and Citizens for a Sound Economy FoundationPhilip Morris1995/E.
123. Beckner P. [letter from Paul Beckner with Citizens for a Sound Economy to Senator Trent Lott and Representative Dennis Hastert]Philip Morris1999.
124. Contact: Peggy Venable. CSE News. Activists tell legislators lawsuit abuse must end. Texas CSE launches radio ad campaign in four media markets.Philip Morris1999.
125. Field Action Team. Field action team quality contacts report 106th Congress Volume IIIPhilip Morris1999:2072104990-2072105640.
126. Armistead W. Capitol Comment: Federal mass tort litigation: An insidious abuse of power: Citizens for a Sound Economy; 1999.
127. Field Action Team. Field Action Team Quality Contacts Report 106th Congress Volume IVPhilip Morris1999.
128. Lambro D. GOP derides Justice's tobacco lawsuit as 'political ploy'. *The Washington Times*. September 23, 1999, 1999;A: 13.
129. Thomas K. Legislators call for reforms aimed at frivolous lawsuits skyrocketing damagers. *Associated Press*. 20 Jan 2000, 2000.
130. Coalition for Legal Reform. [letter from the Coalition for Legal Reform to Majority Leader Trent Lott]2000:2081266562/2081266563.
131. Thomas J. *Time for a priority check at the department of Justice*: Citizens for a Sound Economy; 10 Jan 2002 2002.
132. Citizens for a Sound Economy. CSE Capitol Connect: Time for a priority check at the Department of JusticePhilip Morris2002.
133. American Political Network Inc. New Jersey: Lawmakers battle over charity care. *Health Line*1995;State Lines: 2046573176/2046573177.
134. Beckner P. [letter from Paul Beckner with Citizens for a Sound Economy to Governor Christine Whitman of New Jersey]Philip Morris1995:2046039534/2046039535.
135. Ruess M. Democrats balk at bill raising taxes to fund charity care. *The Record*. 15 Dec1995, 1995: A05.
136. [no author]. Transcript: Opposition to raising state sales taxPhilip Morris1997/E:2085578136.
137. Ross D. Citizens for a Sound Economy vote NO on proposition 10Philip Morris1998/E:2065453658.
138. Schwan J. CSE Commentary: A Hollywood gala to benefit bureaucratsPhilip Morris1998:2065453668/2065453669.
139. Boltz J. 020402 T-Conservatives rally against proposed tax increasesPhilip Morris2002:5000636436/5000636437.
140. Barnes L. FYI: Morning news updatePhilip Morris2003.
141. Americans for Prosperity Illinois. Stop the stealth tobacco tax hike. 2006; <http://web.archive.org/web/20110722221858/http://www.americansforprosperity.org/stop-stealth-tobacco-tax-hike>. Accessed October 25,, 2011.

142. Nugent C, Americans for Prosperity Missouri. Citizen group applauds amicus brief filed by legislative leadership, says tobacco tax hike is billion dollar unfunded mandage. 2006; <http://web.archive.org/web/20110728205044/http://americansforprosperity.org/citizen-group-applauds-amicus-brief-filed-legislative-leadership-says-tobacco-tax-hike-billion-dolla>. Accessed October 25, 2011.
143. Americans for Prosperity South Dakota. AFP announces campaign to defeat tobacco tax increase in South Dakota. 2006; <http://web.archive.org/web/20110728030143/http://americansforprosperity.org/afp-announces-campaign-defeat-tobacco-tax-increase-south-dakota>. Accessed October 25, 2011.
144. Americans for Prosperity South Dakota. Tobacco tax increase defeated during an informal poll on KSOO AM 1140 in Sioux Falls. 2006; <http://www.americansforprosperity.org/tobacco-tax-increase-defeated-during-informal-poll-ksoo-am-1140-sioux-falls>. Accessed October 26, 2006.
145. Americans for Prosperity Texas. Testimony by Peggy Venable before the Texas Tax Reform Commission. 2006; <http://web.archive.org/web/20110725213644/http://americansforprosperity.org/testimony-peggy-venable-texas-tax-reform-commission>. Accessed October 25, 2011.
146. Americans for Prosperity Texas. Where does the sin committee meet at the capitol? 2006; <http://web.archive.org/web/20110724123612/http://www.americansforprosperity.org/where-does-sin-committee-meet-capitol>. Accessed October 25, 2011.
147. Schumsky M. Prop. 86 A tax-the-poor scheme California focus: Hospital industry singles out smokers to enrich itself. 2006; <http://www.freedomworks.org/news/prop-86-a-tax-the-poor-scheme-california-focus>. Accessed January 11, 2012.
148. Schumsky M. Raising the cigarette tax is bad policy. 2006; <http://www.freedomworks.org/publications/raising-the-cigarette-tax-is-bad-policy>. Accessed January 11, 2012.
149. Chris. California voters to decide on huge cigarette tax hike. <http://www.freedomworks.org/2006/09/12/california-voters-to-decide-on-huge-cigarette-tax-hike>. Accessed January 11, 2012.
150. Steinhauer B. Tell Gov. Lingle to put the breaks on a potentially devastating new tax hike! 2006; <http://www.freedomworks.org/press-releases/tell-gov-lingle-to-put-the-breaks-on-a-potentially>. Accessed January 1, 2012.
151. Steinhauer B. Help stop Hawaii's tax-and-spend agenda! <http://www.freedomworks.org/press-releases/help-stop-hawaii%E2%80%99s-tax-and-spend-agenda>. Accessed January 11, 2012.
152. Americans for Prosperity Illinois. State leaders want it both ways on tobacco tax, smoking ban Illinois chapter of Americans for Prosperity says. 2007; <http://web.archive.org/web/20110625121912/http://www.americansforprosperity.org/state-leaders-want-it-both-ways-tobacco-tax-smoking-ban-illinois-chapter-americans-prosperity-says>. Accessed October 24, 2011.
153. Americans for Prosperity. Taxpayers prevail and defeat sneaky tobacco tax grab. 2007; <http://web.archive.org/web/20110709153242/http://www.americansforprosperity.org/print/8566>. Accessed October 25, 2011.
154. Brandon A. Tell Maine lawmakers to hold the line: No new taxes! 2007; <http://www.freedomworks.org/press-releases/tell-maine-lawmakers-to-hold-the-line-no-new-taxes>. Accessed January 11, 2012.
155. Hall B. "Heat on Smokers". Corvallis Gazette-Times. <http://www.freedomworks.org/news/heat-on-smokers>. Accessed January 11, 2012.
156. Brandon A. Support a tax-free budget for South Carolina. 2007; <http://www.freedomworks.org/press-releases/support-a-tax-free-budget-for-south-carolina>. Accessed January 11, 2012.
157. Contact: Joe Calomino, Americans for Prosperity Illinois. Americans for Prosperity: Cigarette tax increase would cost jobs, feed state's out-of-control spending habits. 2008; <http://web.archive.org/web/20110625043207/http://www.americansforprosperity.org/americans-prosperity-cigarette-tax-increase-would-cost-jobs-feed-states-out-control-spending-habi>. Accessed October 24, 2011.
158. Brandon A. Take the anti-tax message directly to Florida lawmakers. <http://www.freedomworks.org/press-releases/take-the-anti-tax-message-directly-to-florida-lawm>. Accessed January 11, 2012.
159. FreedomWorks. Higher taxes coming to Utah. 2008; <http://www.freedomworks.org/publications/higher-taxes-coming-to-utah>. Accessed March 7, 2012.
160. Lyon J. Army, others speak against tobacco hike. 2009; <http://arkansasnews.com/2009/02/03/armey-speaks-against-tobacco-tax-hike/>. Accessed January 13, 2012.



161. FreedomWorks. Enough is Enough-No new tobacco taxes in Arkansas. 2009; <http://www.youtube.com/watch?v=631hQ45TdNc>. Accessed 25 May, 2012.
162. Army D. FreedomWorks Chairman Dick Army writes to Governor Lingle. 2009; <http://www.freedomworks.org/publications/freedomworks-chairman-dick-armey-writes-to-governo>. Accessed January 11 2012.
163. Steinhauser B. Tell the governor: No new taxes! 2009; <http://www.freedomworks.org/press-releases/tell-the-governor-no-new-taxes>.
164. No on 29. About us. nd; <http://www.noon29.com/about-us>. Accessed 16 May, 2012.
165. North J. Proposition 29 could raise \$735M; opponents question fund use. 2012; <http://abclocal.go.com/kabc/story?section=news/state&id=8658901>. Accessed 16 May, 2012.
166. No on 29. [mailer from the No on 29 coalition]2012.
